# Supplementary material
Source: ML conference proceedings conference paper supplement (https://openaccess.thecvf.com/content/cvpr_2015/html/Tang_Subgraph_Decomposition_for_2015_CVPR_paper.html)
Supplement: Supplementary file 2 [file Tang_Subgraph_Decomposition_for_2015_CVPR_supplemental.zip]

Archive with 2 entries (2 files):
- Proof-of-Lemma-1.pdf
- Video.mp4
